# Supplementary material
Source: Springer Nature journal article supplement (https://www.springermedizin.de/resource/supplementary/12990_2014_671_MOESM7_ESM.pdf/9612348)

**Rearing Events**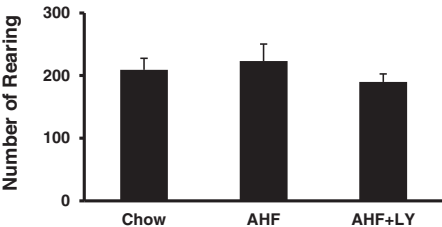**Rearing Duration**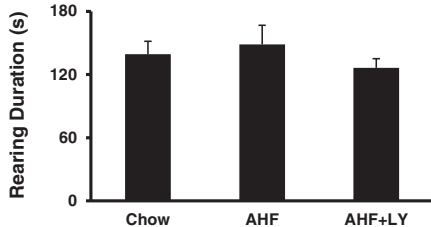**Distance Traveled**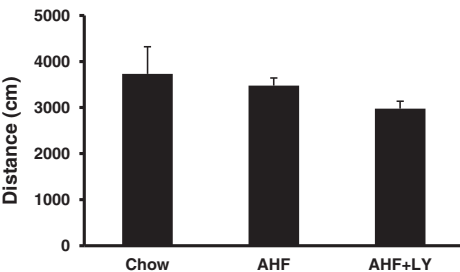**Total Beam Broken**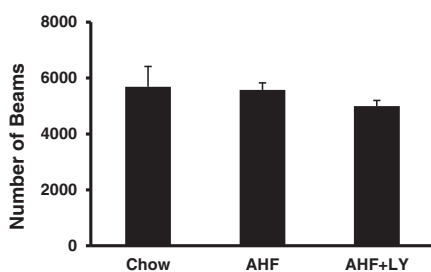**Active Time**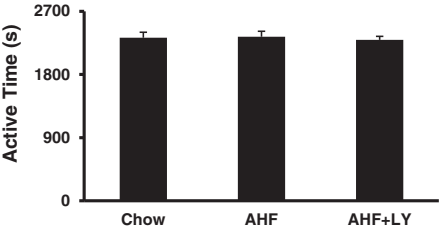**Resting Time**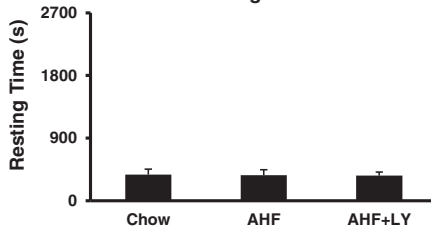

Supplement: MOESM7 [file 9612348]
